# Supplementary material for: Zr-NMOF tagged with heterobifunctionalized aptamers for highly sensitive, multiplexed and rapid imaging mass cytometry
Source: Royal Society of Chemistry journal article supplement (doi:10.1039/d4nr03477e), 2024-01-01
Supplement: d4nr03477e1.pdf [file d4nr03477e1.pdf]

## Zr-NMOF Tagged with Heterobifunctionalized Aptamers for Sensitive and High-Dimensional Imaging Mass Cytometry

Supplementary Material includes:

### Supplementary Figures

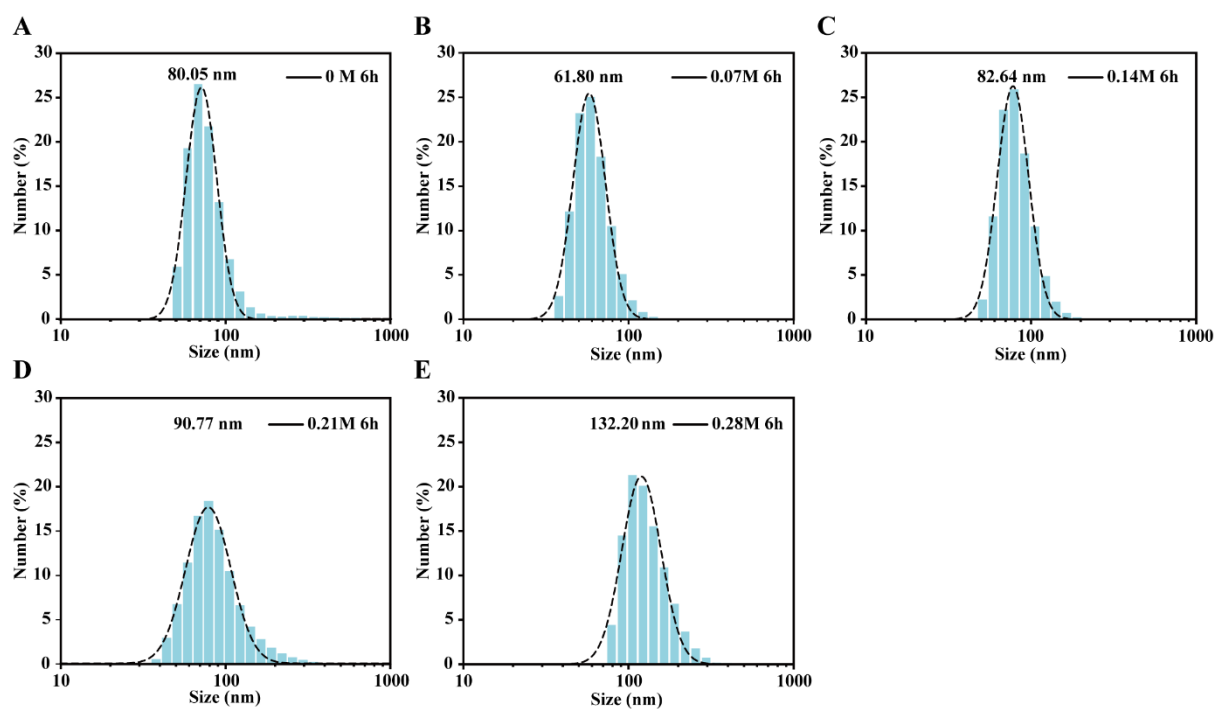

Figure S1 Hydrodynamic size analysis of Zr-NMOF synthesized with different concentrations of H<sub>2</sub>O in DMF as modulators at a 6-h reaction time was measured by dynamic light scattering. (A) 0M 6h (B) 0.07M 6h (C) 0.14M 6h (D) 0.21M 6h (E) 0.28M 6h

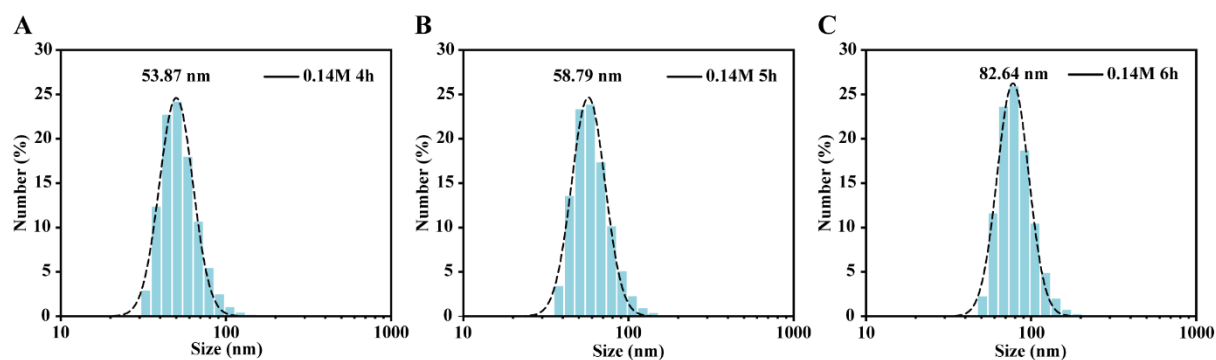

Figure S2 Hydrodynamic size analysis of Zr-NMOF synthesized with 0.14M of water as modulators at different reaction time was measured by dynamic light scattering. (A) 0.14M 4h (B) 0.14M 5h (C) 0.14M 6h

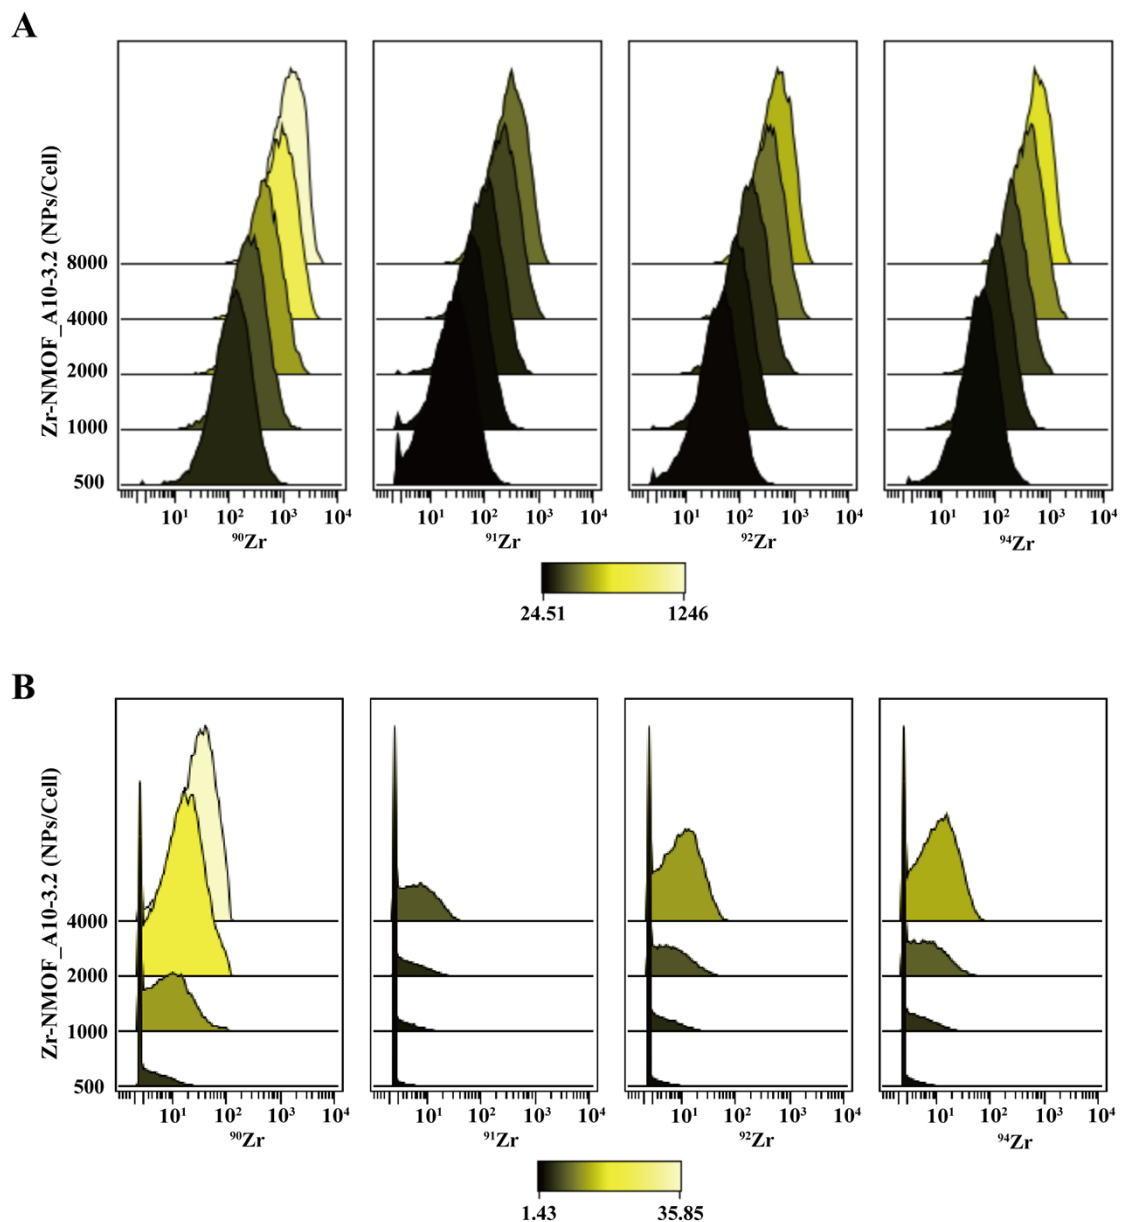

Figure S3 Histograms of Zr-NMOF\_A10-3.2 stained (A) LNCAP and (B) PC-3 with four Zr channels

### Supplementary Tables

Table S1 Atomic ratio of Zr-NMOF measured by XPS

|         | Zr 3d(%) | C 1s(%) | O 1s(%) |
|---------|----------|---------|---------|
| Zr-NMOF | 5.2      | 59.65   | 35.15   |

Table S2 Hybrid panel of Maxpar X8 metal-tagged antibodies and Zr-NMOF\_APT. labeled aptamers for multiplex PaC tissue section imaging

| Reagent             | Name-metal                                             | Clone | Marker        | Vendor         |
|---------------------|--------------------------------------------------------|-------|---------------|----------------|
| Maxpar antibodies   | $\alpha$ -SMA- <sup>158</sup> Gd                       | 1A4   | Stromal       | Abcam          |
|                     | E-CAD- <sup>168</sup> Er                               | 4A2   | Epithelial    | Abcam          |
|                     | CK19- <sup>169</sup> Tm                                | ---   | Epithelial    | Abcam          |
|                     | CD68- <sup>174</sup> Yb                                | ---   | Macrophage    | Abcam          |
| Zr-NMOF_APT.        | PSMA-Zr-NMOF- <sup>90</sup> Zr                         | ---   | Proliferating | Sangon Biotech |
| Cell identification | DNA intercalator- <sup>191</sup> Ir/ <sup>193</sup> Ir | ---   | Nuclei        | Fluidigm       |
